# Supplementary material for: Framework variations in Mn(ii)–organic coordination polymers: solvent templated formation and characterisation of 1D zigzag and straight chain network isomers
Source: Royal Society of Chemistry journal article supplement (doi:10.1039/b511909j), 2005-01-01
Supplement: b511909j.pdf [file b511909j.pdf]

**Framework variations in Mn(II)-organic coordination polymers:  
solvent templated formation and characterisation of 1D zigzag and  
straight chain network isomers**

**Cheng-Bing Ma, Chang-Neng Chen and Qiu-Tian Liu\***

*State Key Laboratory of Structural Chemistry, Fujian Institute of Research on the Structure of  
Matter, Chinese Academy of Sciences, Fuzhou, Fujian 350002, China*

*E-mail: [lqt@ms.fjirsm.ac.cn](mailto:lqt@ms.fjirsm.ac.cn)*

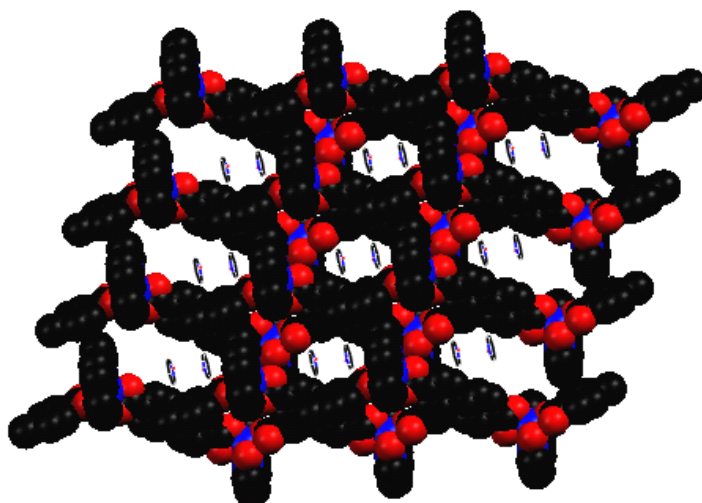

**Figure S1** The packing of the H-bonded grids in **1a**, showing the formation of hexagonal channels occupied by solvate pyridine and water molecules, and with the Mn-bda-phen framework shown in space-filling and the crystallisation guests as capped sticks.

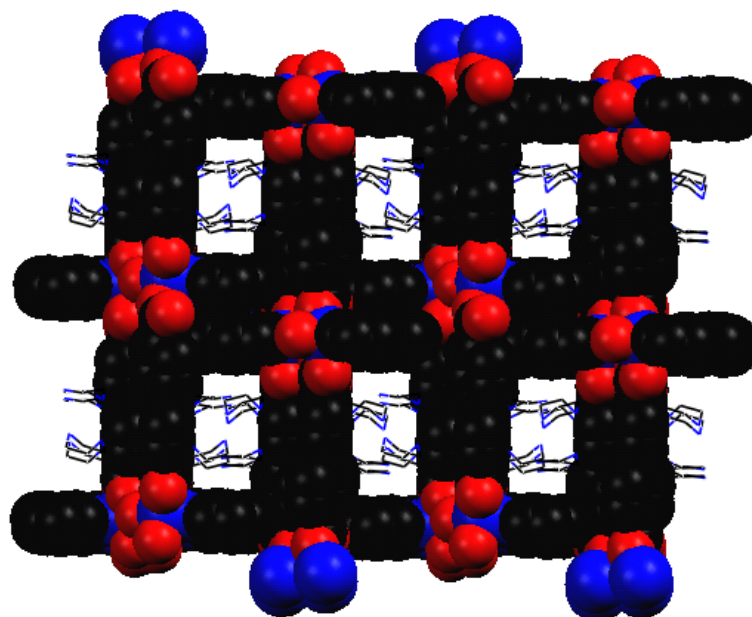

**Figure S2** The packing of the H-bonded layers in **1b**, showing the formation of rectangular channels filled with free piperazine molecules, and with the Mn-bda-phen framework shown in space-filling and the crystallisation guests as capped sticks.

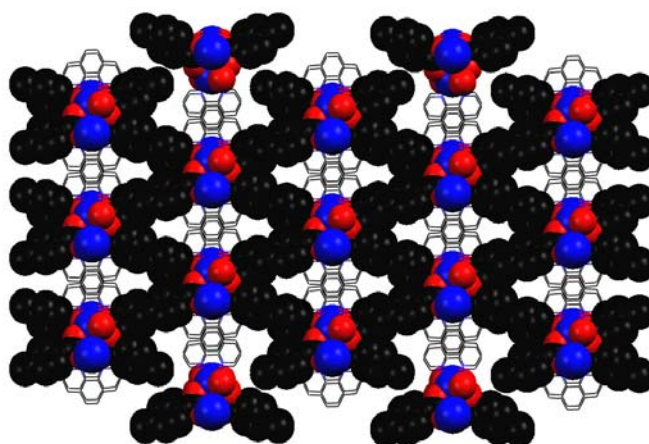

**Figure S3** The packing diagram of complex **2**, showing the formation of rhombus channels filled with phen ligands, and with the Mn-bda framework shown in space-filling and the phen ligands as capped sticks.

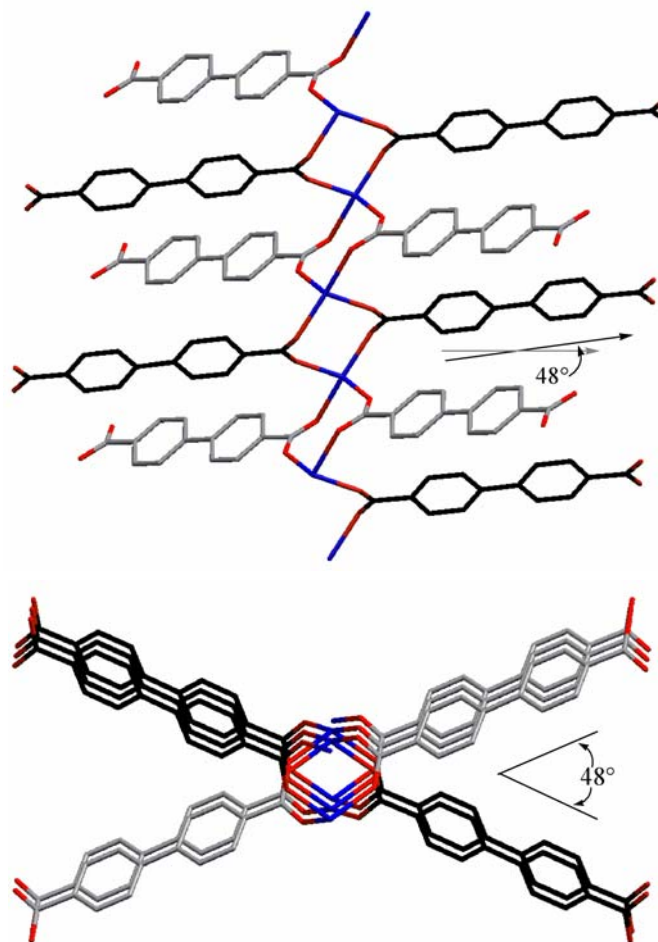

**Figure S4**  $[\text{Mn}(\mu_{1,3}\text{-OCO})_2]_n$  chain in **2** shown perpendicular to (top) and along (bottom) the  $c$  axis.

**Equation S1:**

The equation used for fitting the magnetic susceptibility data of complexes **1a**, **1b** and **2**:

$$\chi_{chain} = \left(\frac{Ng^2 \mu_B^2}{kT}\right) [A + Bx^2] [1 + Cx + Dx^3]^{-1}$$

where  $A = 2.9167$ ,  $B = 208.04$ ,  $C = 15.543$ ,  $D = 2707.2$ , and  $x = |J|/kT$ .

$$\chi_M = \chi_{chain} / (1 - zJ' \chi_{chain} / Ng^2 \beta^2)$$
